# Supplementary material for: Triphenylamine-functionalized magnetic microparticles as a new adsorbent coupled with high performance liquid chromatography for the analysis of trace polycyclic aromatic hydrocarbons in aqueous samples
Source: Royal Society of Chemistry journal article supplement (doi:10.1039/c2an16248b), 2012-01-01
Supplement: c2an16248b.pdf [file c2an16248b.pdf]

Triphenylamine-functionalized magnetic microparticles as a  
new adsorbent coupled with high performance liquid  
chromatography for the analysis of trace polycyclic aromatic  
hydrocarbons in aqueous samples

Yiming Long, Yingzhuang Chen, Fei Yang, Chunyan Chen, Di Pan,  
Qingyun Cai\*, Shouzhuo Yao\*

**Supplementary Materials**

**2. Experimental**

**2.6 HPLC-FLD analysis**

Table S-1 Optimized fluorescent detection program used for PAHs determination

| Time(min) | Excitation(nm) | Emission(nm) | PAH determined |
|-----------|----------------|--------------|----------------|
| 0.0-14.0  | 250            | 400          | Ant            |
| 14.0-16.2 | 280            | 460          | FIA            |
| 16.2-24.0 | 273            | 390          | Pyr, Chr       |
| 24.0-32.0 | 294            | 430          | BbF, BkF       |

\* Corresponding authors. E-mail: *qyc ai0001@hnu.edu.cn*; Fax: 0731-88821848

\* Corresponding authors. E-mail: *szyao@hnu.edu.cn*; Fax: +86-731-88821848

### 3. Results and discussion

#### 3.1 Characterization of prepared products

Figure S-1 FTIR spectroscopy of  $\text{Fe}_3\text{O}_4$  (a),  $\text{Fe}_3\text{O}_4/\text{SiO}_2/\text{TPA}$  composite microspheres (b), and TPA (c).

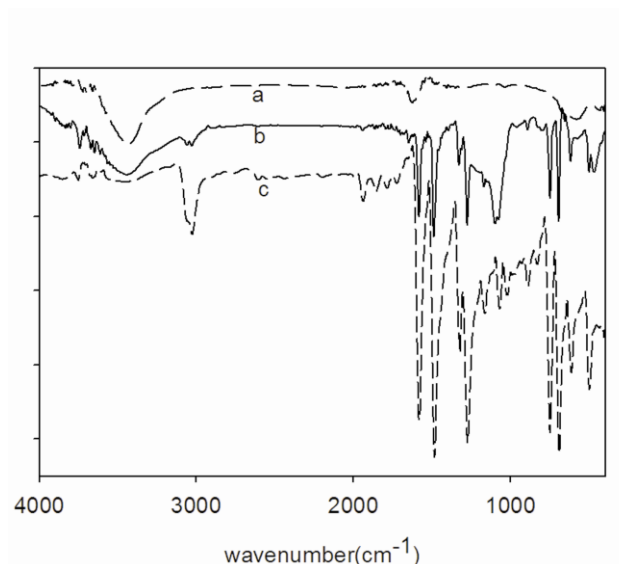

#### 3.2 Magnetic properties of prepared products

Figure S-2 Magnetization curves of  $\text{Fe}_3\text{O}_4$  nanoparticles (a) and  $\text{Fe}_3\text{O}_4/\text{SiO}_2/\text{TPA}$  composite (b). Inset shows the photographs of the dispersion (1) and separation (2) process of  $\text{Fe}_3\text{O}_4/\text{SiO}_2/\text{TPA}$  composite.

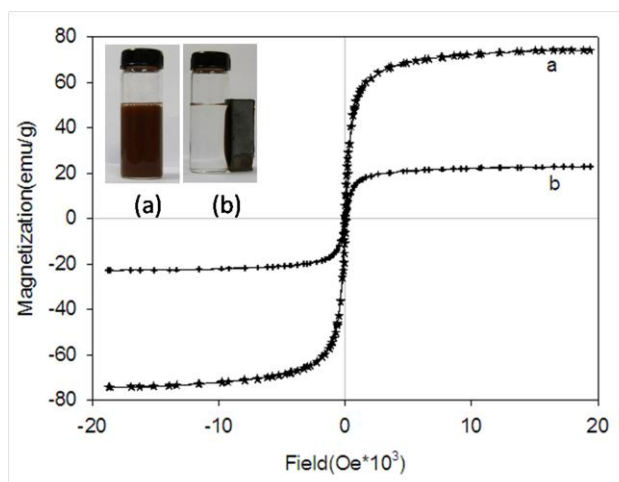

### 3.4 Analytical method validation

Table S-2 Comparative data of the represented method with C-18 SPE cartridge (n = 5)

| Analyte | Spiked<br>( $\mu\text{g/L}$ ) | Recovery (%)  |       | RSD (%)       |      |
|---------|-------------------------------|---------------|-------|---------------|------|
|         |                               | Present study | C-18  | Present study | C-18 |
| Ant     | 0.10                          | 90.01         | 93.82 | 4.52          | 2.55 |
| FlA     | 0.20                          | 87.87         | 94.36 | 2.86          | 3.10 |
| Pyr     | 0.20                          | 85.67         | 89.58 | 1.15          | 2.96 |
| Chr     | 1.50                          | 100.58        | 86.41 | 3.98          | 1.72 |
| BbF     | 0.08                          | 103.02        | 89.70 | 1.83          | 4.75 |
| BkF     | 0.02                          | 101.80        | 90.63 | 2.69          | 3.05 |

### 3.5 Application to real water samples

Table S-3 Analytical results of the proposed MSPE method for the determination of PAHs in real water samples (n = 5)

| Analyte | Spring water       |     | Tap water         |     | River water       |      |
|---------|--------------------|-----|-------------------|-----|-------------------|------|
|         | Detected           | RSD | Detected          | RSD | Detected          | RSD  |
|         | concentrations     | (%) | concentrations    | (%) | concentrations    | (%)  |
|         | ( $\text{ng/L}$ )  |     | ( $\text{ng/L}$ ) |     | ( $\text{ng/L}$ ) |      |
| Ant     | n.d. <sup>a)</sup> | -   | n.d.              | -   | 2.47              | 2.73 |
| FlA     | n.d.               | -   | n.d.              | -   | n.d.              | -    |
| Pyr     | n.d.               | -   | n.d.              | -   | n.d.              | -    |
| Chr     | n.d.               | -   | n.d.              | -   | n.d.              | -    |
| BbF     | n.d.               | -   | n.d.              | -   | n.d.              | -    |
| BkF     | n.d.               | -   | n.d.              | -   | 0.38              | 3.92 |

a) Not detected

Table S-4 Comparative data of the represented method with other methods in literatures

|                     | Present study | Ref. <sup>18</sup> | Ref. <sup>31</sup>    | Ref. <sup>32</sup> | Ref. <sup>33</sup> | Ref. <sup>34</sup>   |
|---------------------|---------------|--------------------|-----------------------|--------------------|--------------------|----------------------|
| Pretreatment method | MSPE          | MSPE               | C30-SPE <sup>a)</sup> | SPME <sup>b)</sup> | SBSE <sup>c)</sup> | MWCNTs <sup>d)</sup> |
| Analytical method   | HPLC-FLD      | GC-MS              | GC-MS                 | GC-MS              | HPLC-FID           | GC-MS                |
| LODs (ng/L)         | 0.04-3.8      | 14.1-70.0          | 30.0-210.0            | 0.32-2.2           | 0.2-1.5            | 2.0-5.3              |
| Recoveries (%)      | 82.5-104.7    | 83.6-119.1         | 79.0-115.0            | 78.8-100.7         | 60.1-86.8          | 74.5-105.0           |

a) C30 solid phase extraction

b) Solid phase microextraction

c) Stir bar sorptive extraction

d) Multi-walled carbon nanotubes
